# Supplementary material for: Prevalence and Impact of Arrhythmia on Outcomes in Restrictive Cardiomyopathy—A Report from the Beijing Municipal Health Commission Information Center (BMHCIC) Database
Source: MDPI journal article supplement (doi:10.3390/jcm12031236), 2023-02-03
Supplement: s1 [file s1]

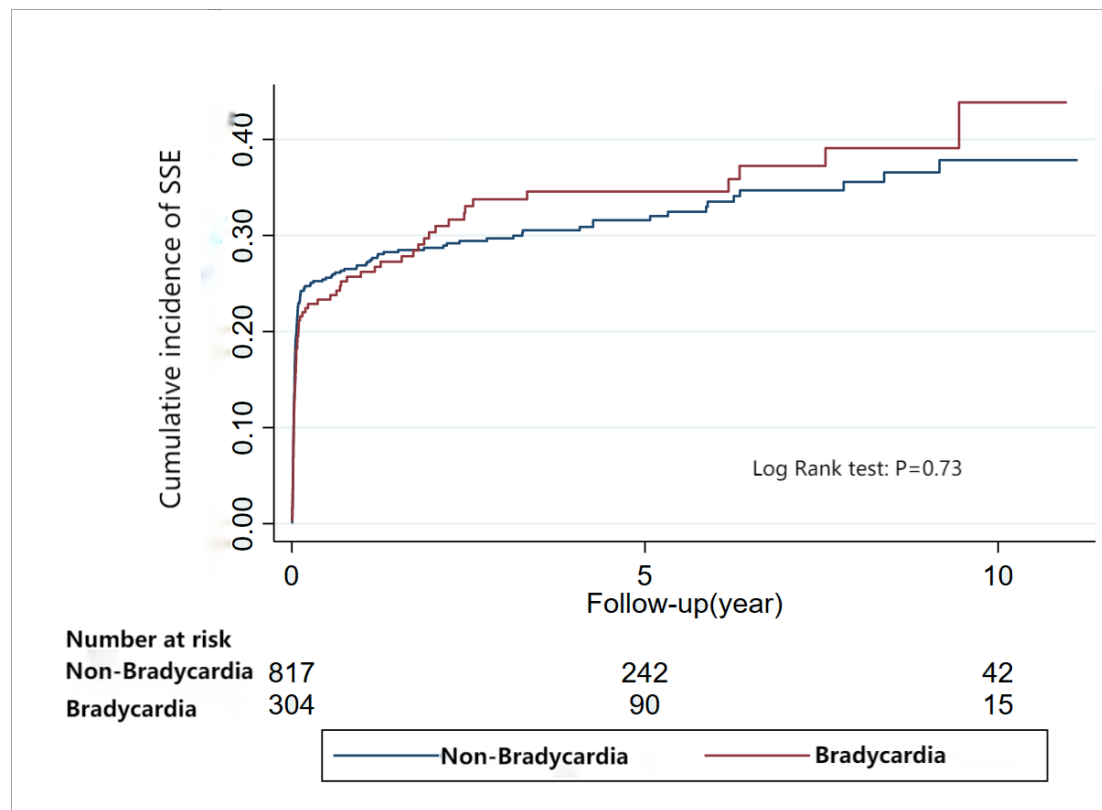

**Figure S1.** Relationship between bradycardia and stroke and systematic embolism in restrictive cardiomyopathy (Kaplan-Meier Analyses)

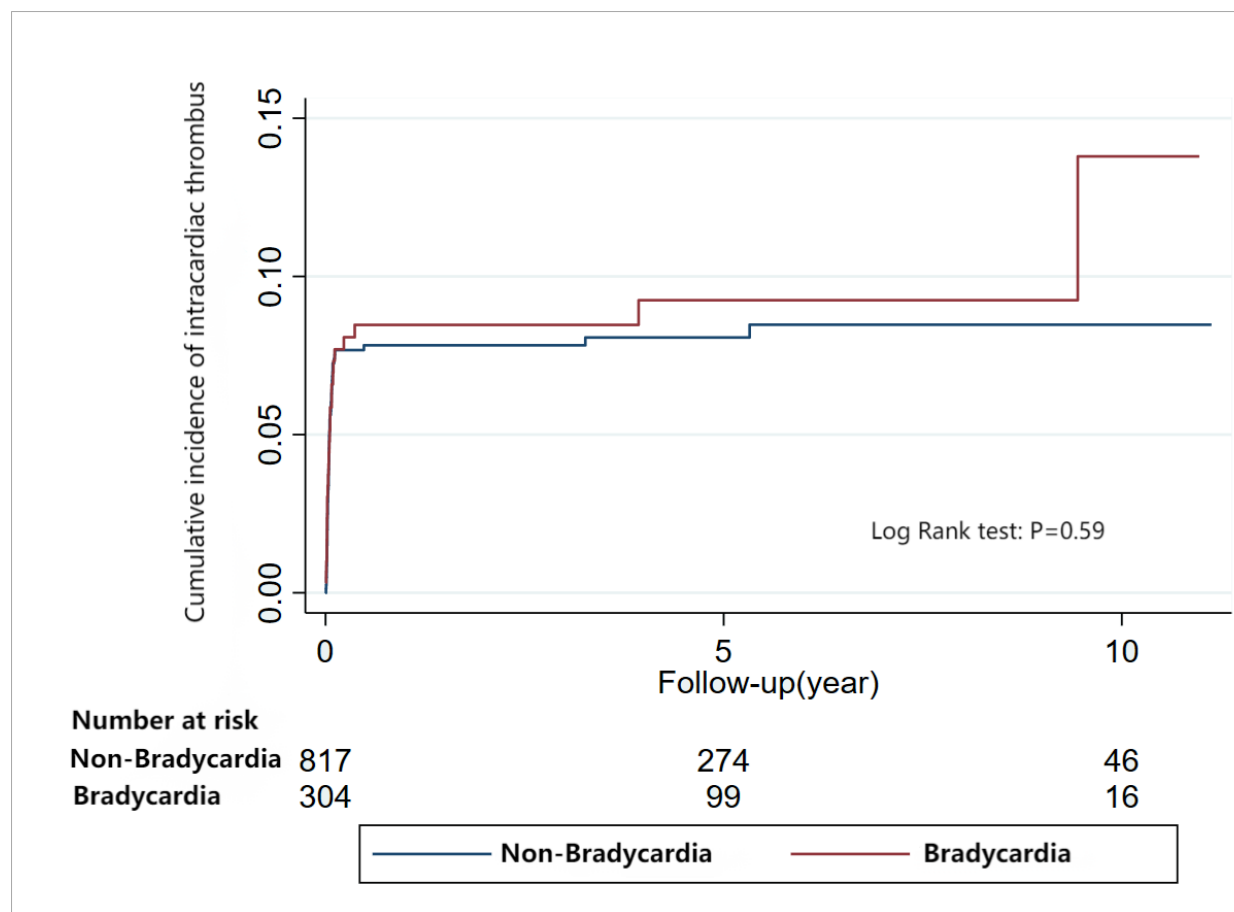

**Figure S2.** Relationship between bradycardia and intracardiac thrombus in restrictive cardiomyopathy (Kaplan-Meier Analyses)

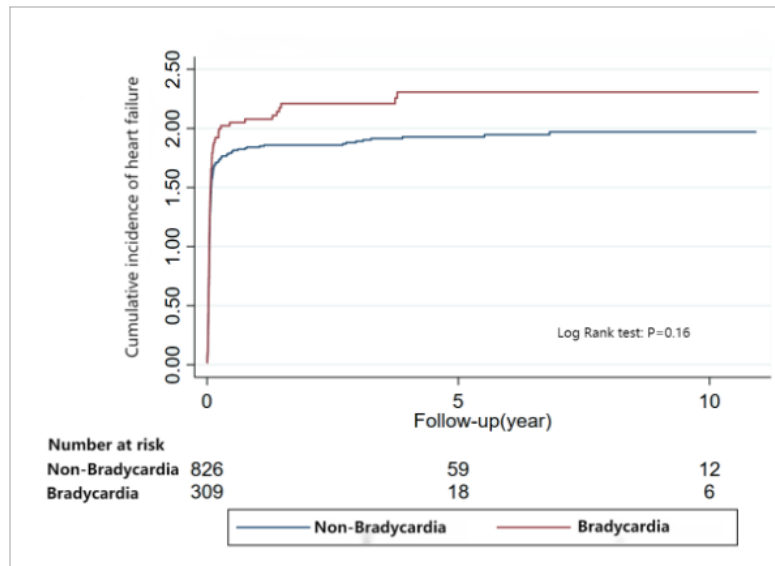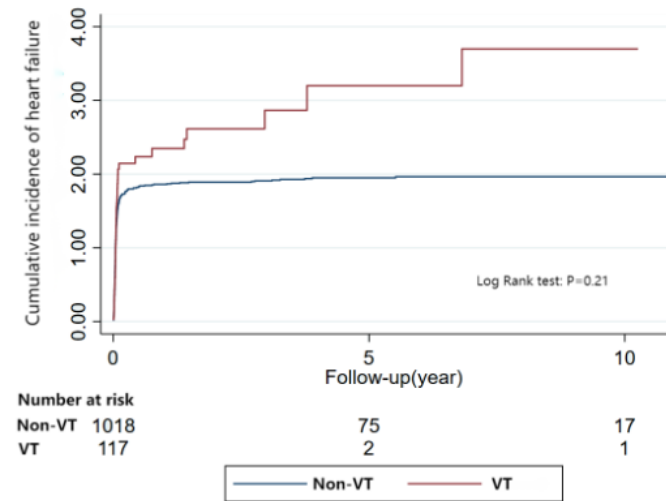

**Figure S3.** Relationship between arrhythmia and heart failure in restrictive cardiomyopathy (Kaplan-Meier Analyses)

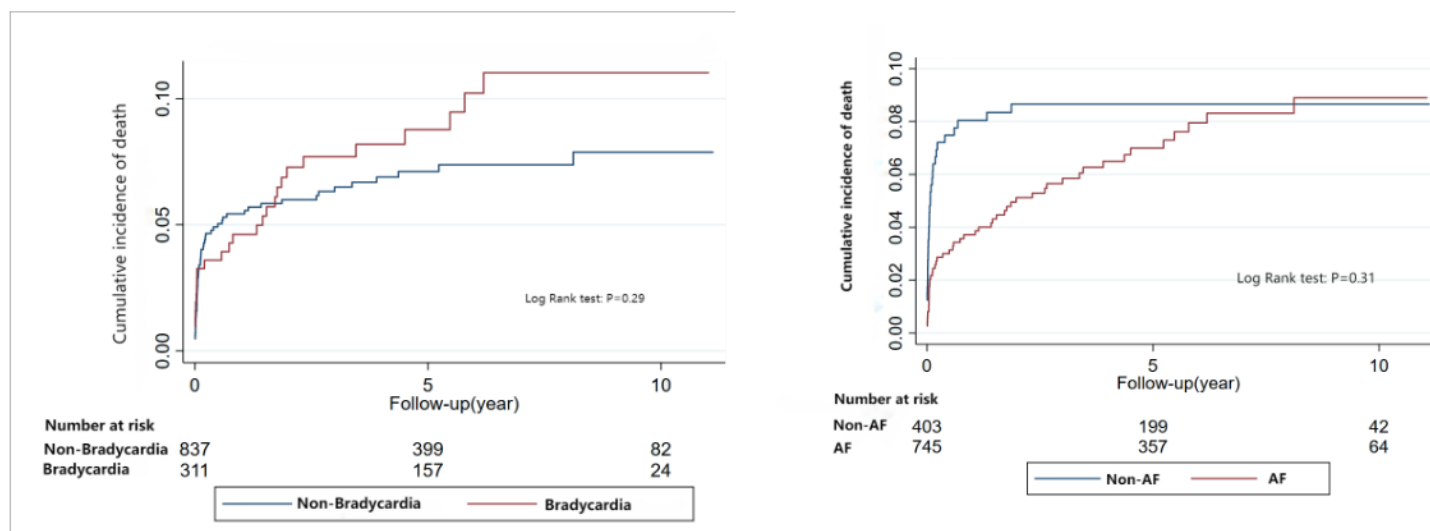

**Figure S4.** Relationship between arrhythmia and mortality risk in restrictive cardiomyopathy (Kaplan-Meier Analyses)

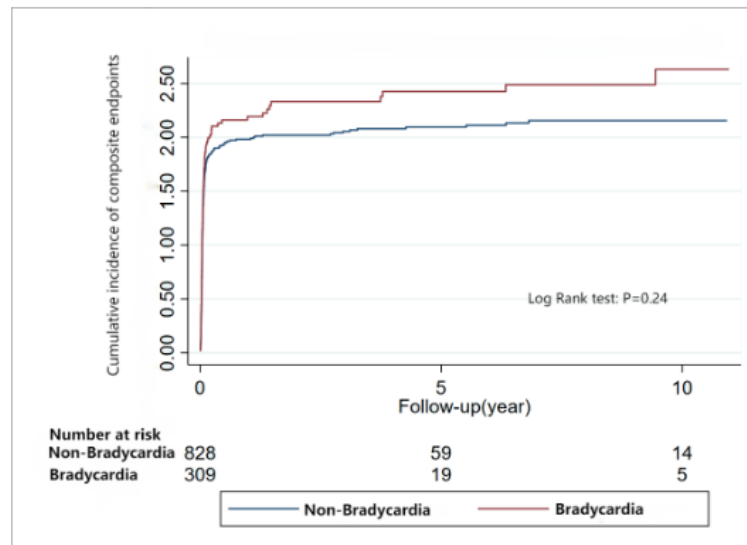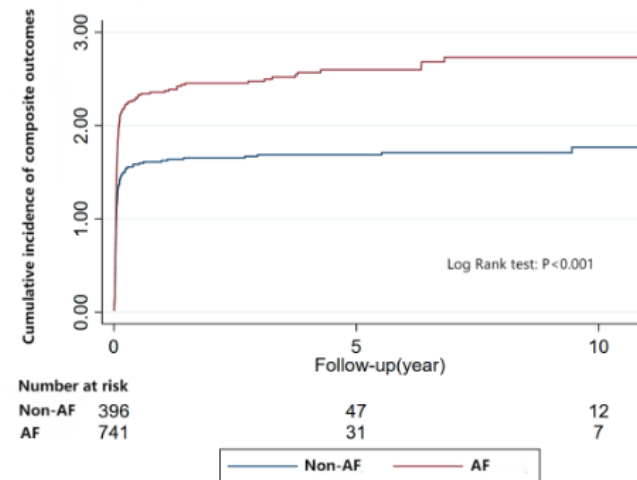

**Figure S5.** Relationship between arrhythmia and composite outcomes in restrictive cardiomyopathy (Kaplan-Meier Analyses)

**Supplementary Table S1. Risk of stroke and systematic embolism in different AF types with RCM.**

| Model                          | Paroxysmal and non-paroxysmal atrial fibrillation |           |                |
|--------------------------------|---------------------------------------------------|-----------|----------------|
|                                | HR                                                | 95%CI     | <i>P value</i> |
| Composite Endpoints            |                                                   |           |                |
| Model 1                        | 1.33                                              | 1.05-1.69 | 0.02           |
| Death                          |                                                   |           |                |
| Model 1                        | 0.47                                              | 0.21-1.06 | 0.07           |
| Stroke and systematic embolism |                                                   |           |                |
| Model 1                        | 1.13                                              | 0.76-1.68 | 0.55           |
| Heart failure                  |                                                   |           |                |

---

|         |      |           |         |
|---------|------|-----------|---------|
| Model 1 | 1.51 | 1.18-1.94 | <0.0001 |
|---------|------|-----------|---------|

---

Intracardiac thrombus

---

|         |      |           |      |
|---------|------|-----------|------|
| Model 1 | 1.29 | 0.60-2.77 | 0.52 |
|---------|------|-----------|------|

---

Model 1. Unadjusted hazard ratio;

**Supplementary Table S2. Risk of stroke and systematic embolism in arrhythmias with RCM.**

| Model                          | RCM with arrhythmias |           |                |
|--------------------------------|----------------------|-----------|----------------|
|                                | HR                   | 95%CI     | <i>P value</i> |
| Composite Endpoints            |                      |           |                |
| Model 1                        | 1.45                 | 1.25-1.68 | P< 0.001       |
| Model 2                        | 1.34                 | 1.14-1.57 | P< 0.001       |
| Death                          |                      |           |                |
| Model 1                        | 0.78                 | 0.49-1.24 | P= 0.29        |
| Model 2                        | 0.49                 | 0.29-0.82 | P= 0.01        |
| Stroke and systematic embolism |                      |           |                |



|                       |      |            |           |
|-----------------------|------|------------|-----------|
| Model 1               | 1.96 | 1.43-2.68  | P< 0.001  |
| Model 2               | 1.55 | 1.10-2.17  | P= 0.01   |
| Heart failure         |      |            |           |
| Model 1               | 1.46 | 1.26-1.70  | P <0.0001 |
| Model 2               | 1.41 | 1.20-1.66  | P< 0.001  |
| Intracardiac thrombus |      |            |           |
| Model 1               | 3.01 | 1.51-6.00  | P=0.02    |
| Model 2               | 4.94 | 2.94-10.39 | P< 0.001  |

Model 1. Unadjusted hazard ratio;

Model 2. Adjusted factors including sex, age, hypertension, diabetes mellitus, prior stroke/TIA, enlarged atrium, hepatic cirrhosis, rheumatic

disease, all malignancy, old myocardial infarction, anemia, amyloidosis, VT, AF and bradycardia.
